# Supplementary material for: Molecular insight into the microstructure and microscopic dynamics of pyridinium ionic liquids with different alkyl chains based on temperature response
Source: Royal Society of Chemistry journal article supplement (doi:10.1039/c6ra26866h), 2017-01-01
Supplement: c6ra26866h1.pdf [file c6ra26866h1.pdf]

## Electronic Supplementary Information (ESI)

### Molecular insight into the microstructure and microscopic dynamics of pyridinium ionic liquids with different alkyl chains based on temperature response

Guanglai Zhu<sup>a,\*</sup>, Xianqu Kang<sup>a</sup>, Siwen Zhou<sup>a</sup>, Xiaoshuan Tang<sup>a</sup>, Maolin Sha<sup>b</sup>,  
Zhifeng Cui<sup>a</sup>, Xinsheng Xu<sup>a</sup>

<sup>a</sup>*Institute of Atomic and Molecular Physics, Anhui Normal University, Wuhu 241000, China*

<sup>b</sup>*Department of Chemistry and Chemical Engineering, Hefei Normal University, Hefei 230061, China*

\* E-mail: zhglai@mail.ahnu.edu.cn

#### 1. The snapshot of polar region and nonpolar region

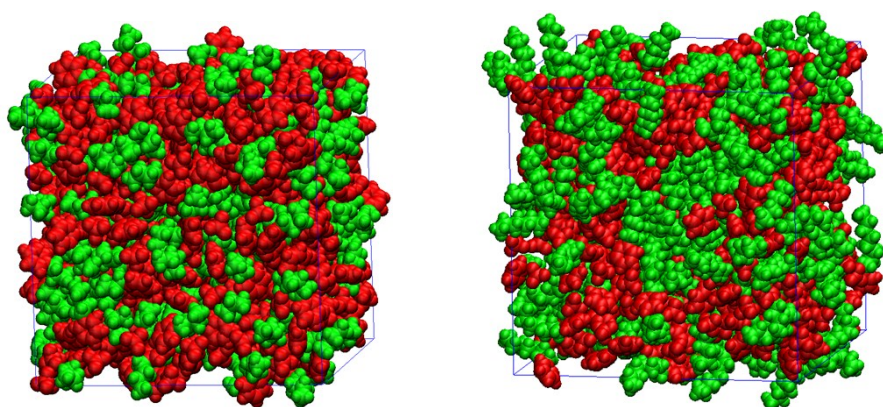

**Fig. S1** The snapshot of the polar region and the nonpolar region of [BPy][BF<sub>4</sub>] (Left) and [OPy][BF<sub>4</sub>] (Right) at 373 K. The polar region was showed in red color including pyridinium ring and anion; the nonpolar region was showed in green color including alkyl chains.

## 2. The center-of-mass radial distribution functions

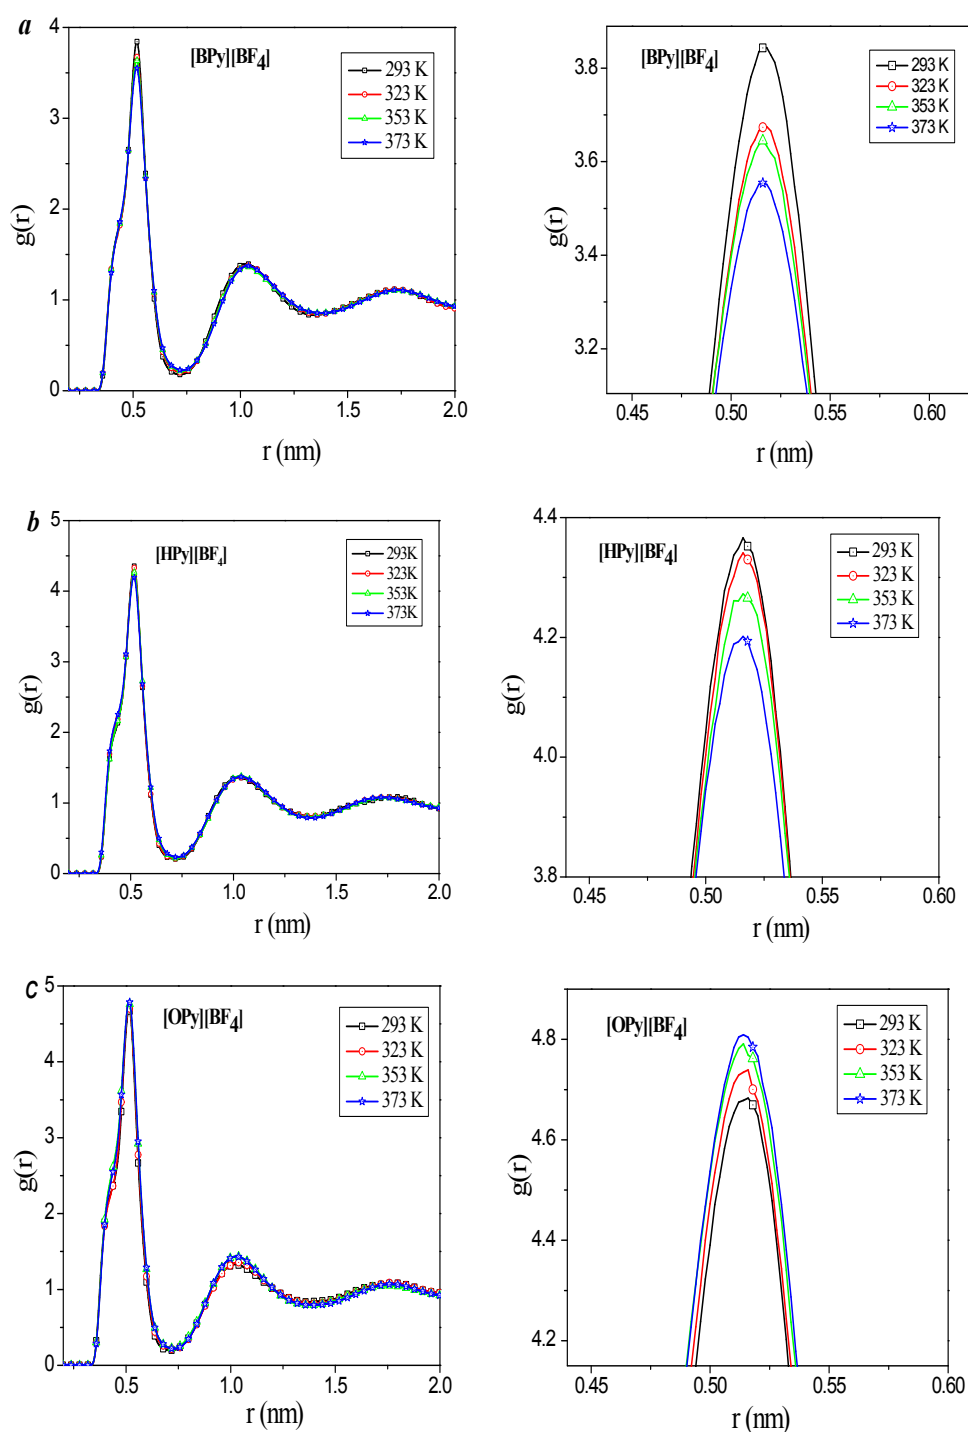

**Fig. S2** The center-of-mass RDFs for anions around the pyridine ring of cations. (a). [BPy][BF<sub>4</sub>], (b). [HPy][BF<sub>4</sub>] and (c). [OPy][BF<sub>4</sub>].

### 3. The spatial distribution functions

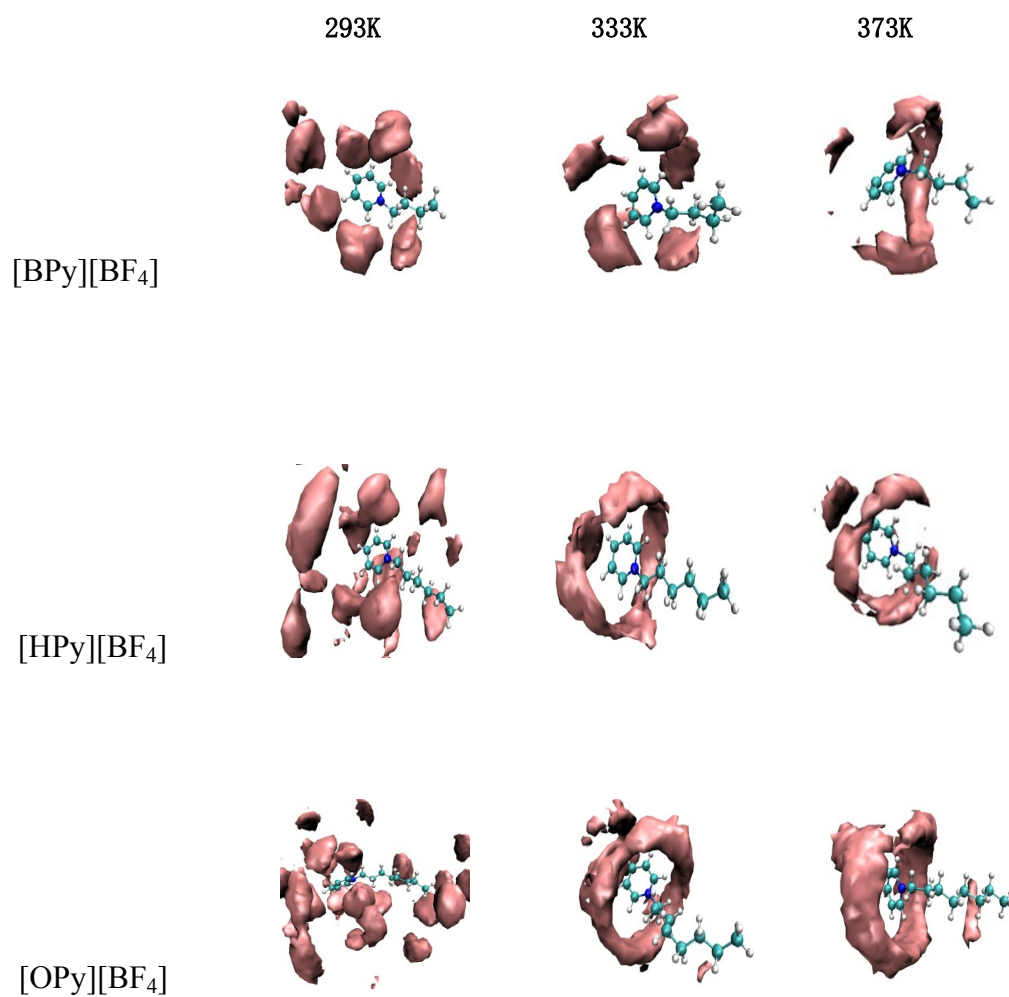

*Fig. S3* Spatial distribution of anion around cation, isovalue=22.

#### 4. The velocity autocorrelation functions of cation and anion

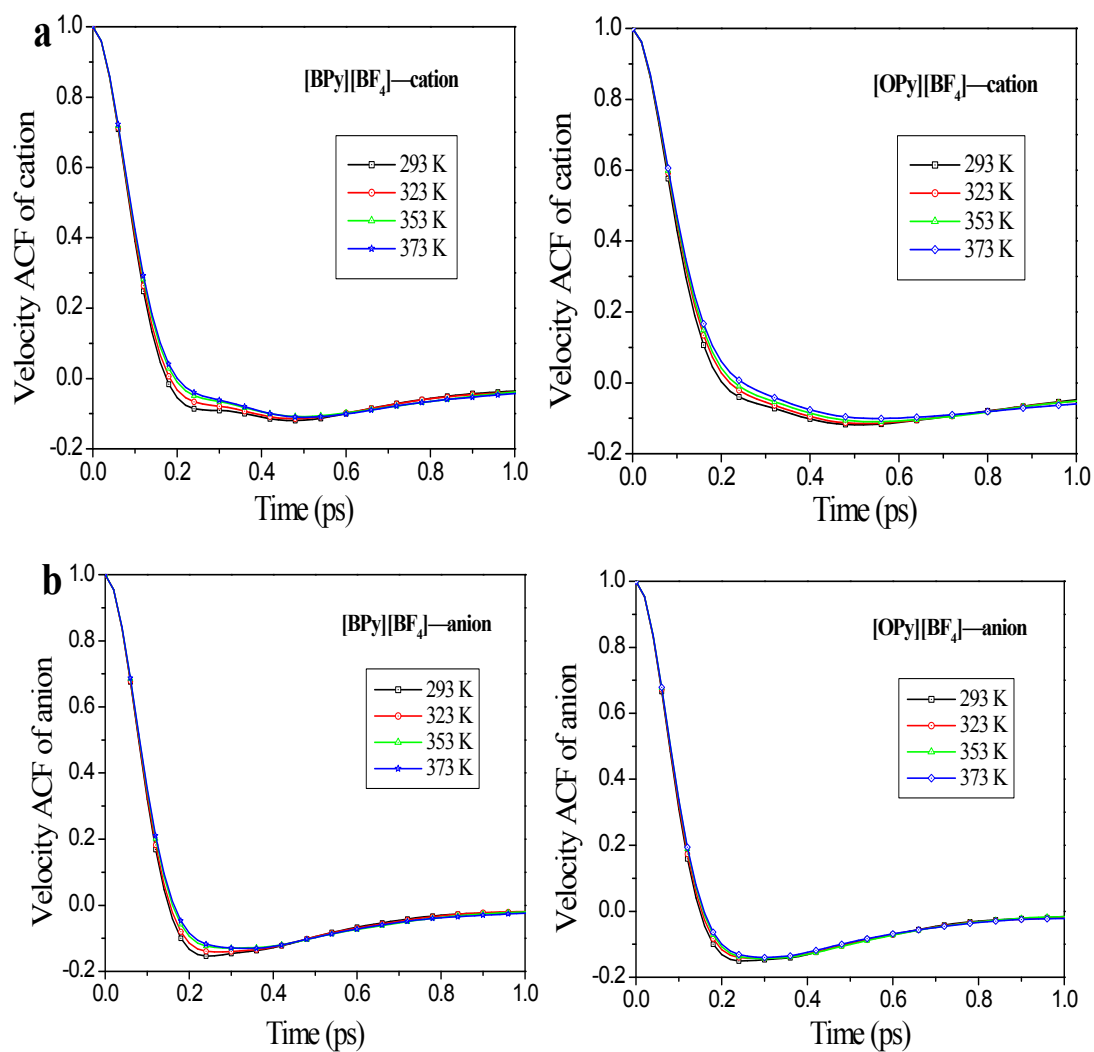

**Fig. S4** Velocity autocorrelation functions of cation (a) and anion (b) of [BPy][BF<sub>4</sub>] and [OPy][BF<sub>4</sub>] under different temperature.

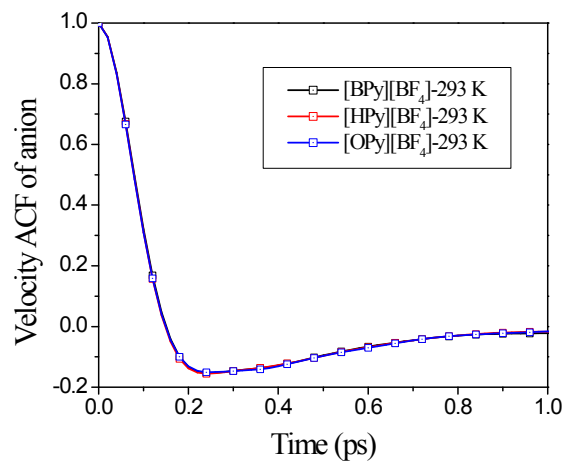

**Fig. S5** Velocity autocorrelation functions of anion of three ILs at 293 K.

## 5. The association dynamics

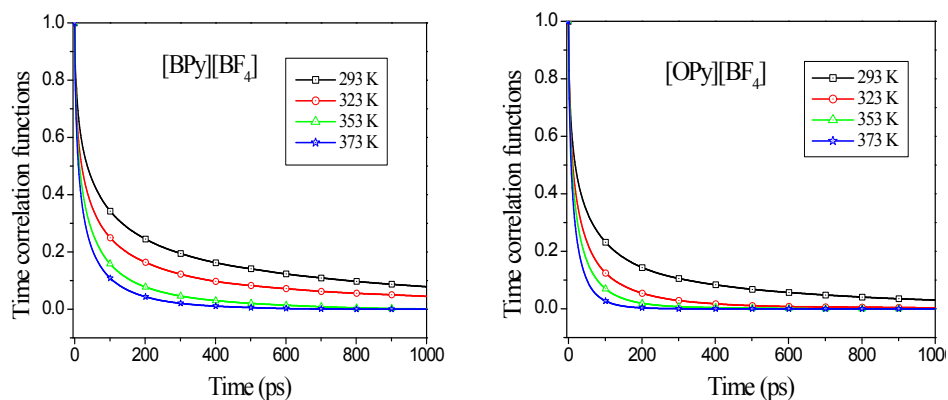

**Fig. S6** Time correlation functions of atoms HA1-B under different temperatures.

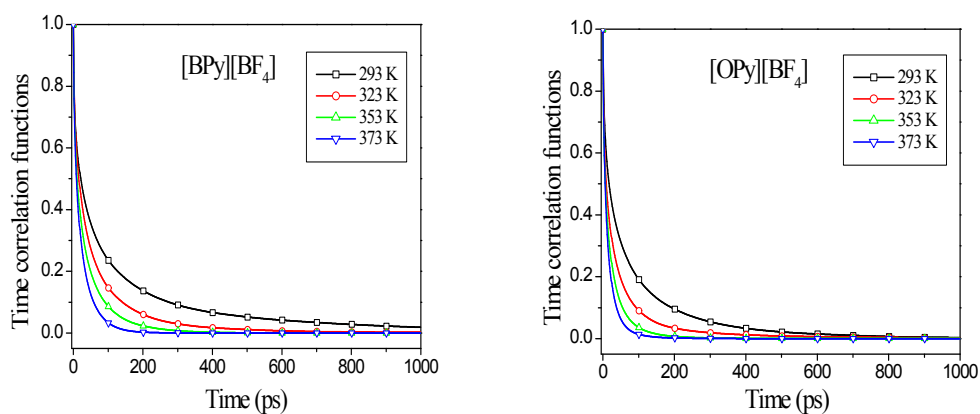

**Fig. S7** Time correlation functions of atoms CT<sub>n</sub>-CT<sub>n</sub> (n=4, 8) under different temperatures

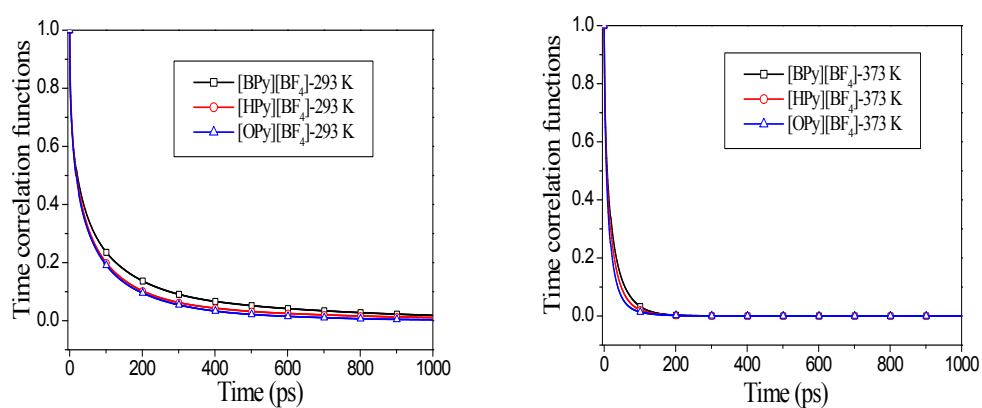

**Fig. S8** Time correlation functions of CT<sub>n</sub>-CT<sub>n</sub> at 293 K (a) and 373 K (b) of three ILs.
